# Supplementary material
Source: publisher site journal article supplement (https://www.kjim.org/upload/media/kjim-2025-101-Supplementary-Table-1.pdf)
Supplement: Supplementary file 1 [file kjim-2025-101-Supplementary-Table-1.pdf]

**Supplementary Table 1. Cognitive debriefing interviews**

| Question                                                                                                                        | Yes | No | Answer to "No"                                                                                                                                                                            |
|---------------------------------------------------------------------------------------------------------------------------------|-----|----|-------------------------------------------------------------------------------------------------------------------------------------------------------------------------------------------|
| Were the instructions of this questionnaire easy to understand?                                                                 | 10  | 0  |                                                                                                                                                                                           |
| Were the questions clear and unambiguous to you?                                                                                | 10  | 0  |                                                                                                                                                                                           |
| Do you think the response options fit the questions well?                                                                       | 10  | 0  |                                                                                                                                                                                           |
| Do you feel this questionnaire appropriately applies to your experience with psoriatic arthritis (PsA)                          | 9   | 1  | 2. Fatigue - It was difficult to distinguish whether the fatigue was caused by psoriatic arthritis or experienced during daily life, leading to prolonged consideration before answering. |
| Did you find the time taken to complete the questionnaire appropriate?                                                          | 10  | 0  |                                                                                                                                                                                           |
| Did you experience any discomfort or difficulties while completing the questionnaire?                                           | 0   | 10 |                                                                                                                                                                                           |
| Do you think this questionnaire adequately reflects your daily physical activities, emotions, or challenges due to the illness? | 10  | 0  |                                                                                                                                                                                           |
| Do you have any other comments or suggestions?                                                                                  | 0   | 10 |                                                                                                                                                                                           |
